# Supplementary material for: Whole-tissue 3D imaging reveals intra-adipose sympathetic plasticity regulated by NGF-TrkA signal in cold-induced beiging
Source: PubMed Central journal article supplement (PMC5966360; doi:10.1007/s13238-018-0528-5), 2018-03-27
Supplement: 13238_2018_528_MOESM3_ESM.pdf [file 13238_2018_528_MOESM3_ESM.pdf]

## **Supplemental Movie Legends**

### **Movie S1. Volume fluorescence-imaging of sympathetic arborizations in iWAT of the wildtype mice maintained at room temperature, related to Figure 1.**

The wildtype mice were maintained at room temperature, and their iWAT was processed for the whole-mount immunolabeling of tyrosine hydroxylase, and imaged at 12.6x magnification on the lightsheet microscope.

### **Movie S2. Volume fluorescence-imaging of sympathetic arborizations in iWAT of the wildtype mice after cold challenge, related to Figure 1.**

The wildtype mice were subject to cold challenge for 5 days, and their iWAT was processed for the whole-mount immunolabeling of tyrosine hydroxylase, and imaged at 12.6x magnification on the lightsheet microscope.

## Supplemental Figures and Legends

### Figure S1

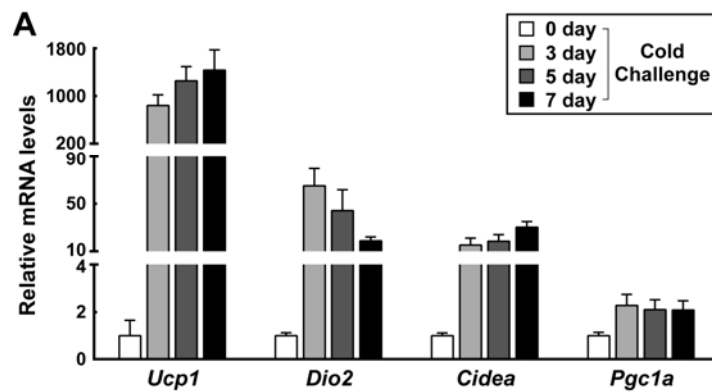

**Figure S1. Intra-adipose sympathetic plasticity in response to cold challenge, related to Figure 1.**

(A) The wildtype mice were subject to cold challenge. iWAT was harvested at indicated time points, and expression levels of the beiging-related genes were determined by the qPCR analysis. n=4, mean  $\pm$  SEM.

## Figure S2

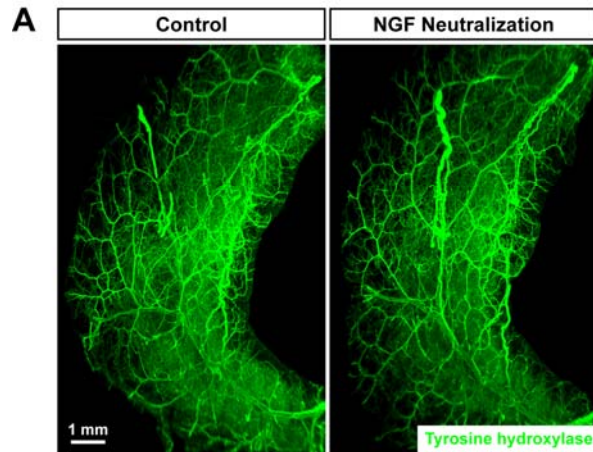

**Figure S2. Intra-adipose sympathetic plasticity is regulated by NGF, related to Figure 4.**

(A) The wildtype mice were administrated with NGF-neutralizing antibody or control IgG, and maintained at room temperature for 7 days. iWAT was harvested and processed for the volume fluorescence-imaging of anti-tyrosine hydroxylase. Representative 3D projections of iWAT imaged at 1.26x magnification on the lightsheet microscope.

**Figure S3**

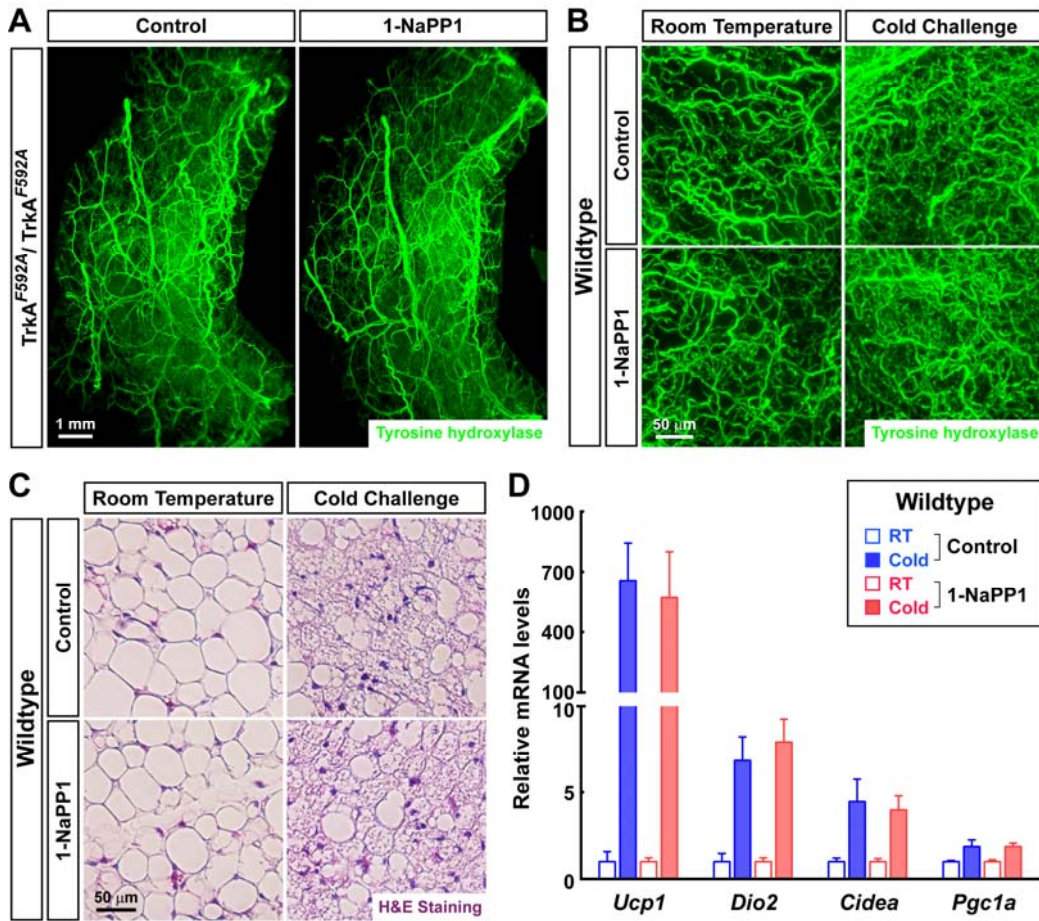

**Figure S3. Intra-adipose sympathetic plasticity is regulated by the TrkA signal, related to Figure 5.**

(A) *TrkA<sup>F592A/F592A</sup>* mice were daily treated with 1-NaPP1 or vehicle control. iWAT was processed for the volume fluorescence-imaging of anti-tyrosine hydroxylase. Representative 3D projections of iWAT imaged at 1.26x magnification on the lightsheet microscope. (B to D) The wildtype mice daily-treated with 1-NaPP1 or vehicle control were subject to cold challenge. (B) iWAT was processed for the volume fluorescence-imaging of anti-tyrosine hydroxylase. Representative 3D projections of iWAT imaged at 12.6x magnification on the lightsheet microscope. (C) Appearance of multilocular beige cells in iWAT was examined by H&E staining. (D) Expression levels of the beige-related genes in iWAT were determined by the qPCR analysis. n=5, mean  $\pm$  SEM.

## Figure S4

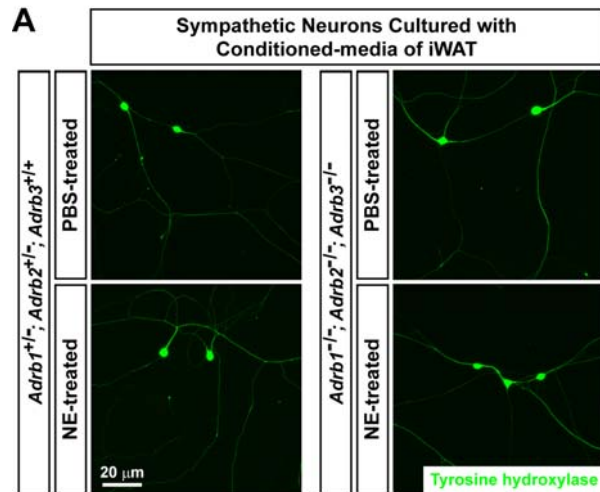

**Figure S4. Cold-elicited NGF expression in WAT depends on the catecholamine signal, related to Figure 6.**

(A) iWAT of *Adrb1*<sup>-/-</sup>; *Adrb2*<sup>-/-</sup>; *Adrb3*<sup>-/-</sup> mice or control mice (*Adrb1*<sup>+/+</sup>; *Adrb2*<sup>+/+</sup>; *Adrb3*<sup>+/+</sup>) was *in vitro* treated with 100μM norepinephrine (NE) or control PBS. The conditioned-media of iWAT were collected and administrated to cultured sympathetic neurons. Representative images of sympathetic neurons immunolabeled by anti-tyrosine hydroxylase.
